# Supplementary material for: Androgen Receptor Inhibits Estrogen Receptor-α Activity and Is Prognostic in Breast Cancer
Source: Oxford University Press journal article supplement (doi:10.1158/0008-5472.can-09-0452), 2009-07-29
Supplement: 00085472can090452-sup-can_8-1-09_peters.pdf [file 00085472can090452-sup-can_8-1-09_peters.pdf]

**Supplementary Table 1. Association of ER $\alpha$  status in a cohort of invasive ductal breast carcinomas with clinicopathological parameters and AR immunostaining**

|                                              | ER $\alpha$ positive ( $\geq 10\%$ )<br>(n=157) | ER $\alpha$ negative ( $< 10\%$ )<br>(n=58) | p value*   |
|----------------------------------------------|-------------------------------------------------|---------------------------------------------|------------|
| Age (median years, range)                    | 54.0 (29-87)                                    | 55.9 (24.0-80.0)                            | $p=0.435$  |
| Tumor size (mm)                              | 15.5 (3.0-75.0)                                 | 23.0 (7.0-80.0)                             | $p<0.0001$ |
| Histological grade                           |                                                 |                                             |            |
| well                                         | 33                                              | 3                                           | $p<0.0001$ |
| moderate                                     | 74                                              | 8                                           |            |
| poor                                         | 50                                              | 47                                          |            |
| Nodal status                                 |                                                 |                                             |            |
| negative                                     | 79                                              | 29                                          | $p=0.879$  |
| positive                                     | 75                                              | 29                                          |            |
| missing                                      | 3                                               |                                             |            |
| PR status                                    |                                                 |                                             |            |
| negative ( $\leq 10\%$ )                     | 39                                              | 53                                          | $p<0.0001$ |
| positive ( $> 10\%$ )                        | 118                                             | 5                                           |            |
| HER-2/ <i>neu</i> status <sup>a</sup>        |                                                 |                                             |            |
| negative                                     | 133                                             | 38                                          | $p=0.002$  |
| positive                                     | 19                                              | 18                                          |            |
| missing                                      | 5                                               | 2                                           |            |
| AR level (median<br>% positive cells, range) | 83.0 (0-96.0)                                   | 25.5 (0-95.0)                               | $p<0.0001$ |
| Death to breast cancer                       |                                                 |                                             |            |
| No                                           | 136                                             | 39                                          | $p=0.003$  |
| Yes                                          | 21                                              | 19                                          |            |

a= HER-2/*neu* status determined using fluorescence in situ hybridization

\* p value by Chi-Squared test for all variables except Age, Tumor size and AR, which were assessed by the Mann Whitney U test

**Supplementary Table 2. Univariate Cox Regression analyses for relapse-free survival and overall survival in ERα positive cohort**

| Variable                                 | Relapse-free survival |           |              | Overall survival |            |                   |
|------------------------------------------|-----------------------|-----------|--------------|------------------|------------|-------------------|
|                                          | Relative risk         | 95% CI    | P value      | Relative risk    | 95% CI     | P value           |
| Tumor size <sup>a</sup><br>(n=149)       | 1.63                  | 0.82-3.23 | 0.163        | 1.49             | 0.61-3.66  | 0.383             |
| Grade <sup>b</sup><br>(n=145)            | 7.19                  | 0.97-53.1 | 0.053        | 4.10             | 0.54-30.98 | <b>0.170</b>      |
| Lymph status <sup>c</sup><br>(n=150)     | 2.74                  | 1.33-5.65 | <b>0.008</b> | 1.65             | 0.67-4.05  | <b>0.27</b>       |
| PR status <sup>d</sup><br>(n=153)        | 0.35                  | 0.18-0.69 | <b>0.002</b> | 0.21             | 0.09-0.50  | <b>&lt;0.0001</b> |
| HER-2/neu status <sup>e</sup><br>(n=148) | 3.59                  | 1.72-7.51 | <b>0.001</b> | 5.10             | 1.99-13.08 | <b>0.001</b>      |
| AR status <sup>f</sup><br>(n=153)        | 0.42                  | 0.21-0.82 | <b>0.011</b> | 0.24             | 0.09-0.62  | <b>0.003</b>      |

**Supplementary Table 3. Multivariate analysis of all significant variables in univariate analysis in ERa positive cohort**

| Variable                       | Relapse-free survival (n=137) |           |              | Overall survival (n=141) |            |                   |
|--------------------------------|-------------------------------|-----------|--------------|--------------------------|------------|-------------------|
|                                | Relative risk                 | 95% CI    | P value      | Relative risk            | 95% CI     | P value           |
| Lymph node status <sup>c</sup> | 2.30                          | 1.13-5.46 | 0.033        | -                        | -          | -                 |
| Grade                          | 3.77                          |           | 0.198        | -                        | -          | -                 |
| PR status <sup>d</sup>         | 0.41                          | 0.21-0.91 | <b>0.016</b> | 0.21                     | 0.09-0.50  | <b>&lt;0.0001</b> |
| HER-2/neu status <sup>e</sup>  | 3.62                          | 1.63-8.05 | <b>0.002</b> | 7.38                     | 2.69-20.27 | <b>&lt;0.0001</b> |
| AR status <sup>f</sup>         | 0.33                          | 0.20-0.85 | <b>0.003</b> | 0.22                     | 0.08-0.58  | <b>0.002</b>      |

a = tumor size (mm) as a dichotomous variable cut point <20 vs ≥20

b= tumor grade (well or moderate vs poor)

c= lymph node status (negative vs positive)

d = PR status (% positive cells) as a dichotomous variable cut point <10 vs ≥10

e=HER-2/neu status (negative vs positive) determined by fluorescence in situ hybridization

f= AR status (% positive cells) as a dichotomous variable median cut point <75 vs ≥75
